# Supplementary material for: A ligand knowledge base for carbenes (LKB-C): maps of ligand space
Source: Royal Society of Chemistry journal article supplement (doi:10.1039/b909229c), 2009-01-01
Supplement: b909229c.pdf [file b909229c.pdf]

## **A Ligand Knowledge Base for Carbenes (LKB-C): Maps of Ligand Space**

Natalie Fey,\* Mairi F. Haddow, Jeremy N. Harvey, Claire L. McMullin, A. Guy Orpen\*

*School of Chemistry, University of Bristol, Cantock's Close, Bristol BS8 1TS, U.K.*

### **Supporting Information**

|                                                                                     |      |     |    |
|-------------------------------------------------------------------------------------|------|-----|----|
| <i>a) symmetrical, R=</i>                                                           | H    | Me  | Ph |
| :CR <sub>2</sub>                                                                    | 1    | 2   | 3  |
| 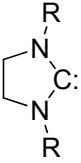   | 4    | 5   | 6  |
|    | 7    | 8   | 9  |
|    | 10   | 11  | 12 |
|   | 13   | 14  | 15 |
|  | 16   | 17  | 18 |
| <i>b) asymmetrical, R=</i>                                                          | H    | Me  | Ph |
| :CMe(OR)                                                                            | 19   | 20  | 21 |
| :CPh(OR)                                                                            | 22   | 23  | 24 |
| :CHR                                                                                | (1)  | 25  | 26 |
| :CMeR                                                                               | (25) | (2) | 27 |
|  | 28   | 29  | 30 |
|  | 31   | 32  | 33 |
|  | 34   | 35  | 36 |
| :CR(CH=CH <sub>2</sub> )                                                            | 37   | 38  | 39 |

|                                         |      |    |    |
|-----------------------------------------|------|----|----|
| :CH(CH=C(H)R)                           | (37) | 40 | 41 |
| :CR(P(NMe <sub>2</sub> ) <sub>2</sub> ) | 42   | 43 | 44 |
| :C(NMe <sub>2</sub> )(PR <sub>2</sub> ) | 45   | 46 | 47 |

| <i>c) other species</i>                                                                |                                                                                                                                                                                                            |                                                                                         |                                                                                                                              |
|----------------------------------------------------------------------------------------|------------------------------------------------------------------------------------------------------------------------------------------------------------------------------------------------------------|-----------------------------------------------------------------------------------------|------------------------------------------------------------------------------------------------------------------------------|
| 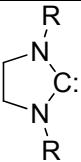      | R=cyclohexyl 48<br>R= <sup>t</sup> butyl 49<br>R=adamantyl (Ad) 50<br>R=2,4,6-Me <sub>3</sub> -C <sub>6</sub> H <sub>2</sub> (Mes) 51<br>R=2,6- <i>i</i> Pr <sub>2</sub> -C <sub>6</sub> H <sub>3</sub> 52 |       | R=Cy 53<br>R= <sup>t</sup> Bu 54<br>R=Ad 55<br>R=Mes 56<br>R=2,6- <i>i</i> Pr <sub>2</sub> -C <sub>6</sub> H <sub>3</sub> 57 |
| :C(OMe)(CH=CH <sub>2</sub> )<br>58                                                     | :C(OMe)(CH=C(H)Me)<br>59                                                                                                                                                                                   | :C(CH=C(H)Me) <sub>2</sub><br>60                                                        | :CMe(NH <sub>2</sub> ) 61                                                                                                    |
| :CMe(NMe <sub>2</sub> ) 62                                                             | :CPh(NMe <sub>2</sub> ) 63                                                                                                                                                                                 |  64   |  65                                       |
|  66  |  67                                                                                                                      | :C(CN) <sub>2</sub> 68                                                                  | :CMe(CN) 69                                                                                                                  |
| :CPh(CN) 70                                                                            | :CF <sub>2</sub> 71                                                                                                                                                                                        | :CCl <sub>2</sub> 72                                                                    | :CBr <sub>2</sub> 73                                                                                                         |
| :Cl <sub>2</sub> 74                                                                    | :C(CF <sub>3</sub> ) <sub>2</sub> 75                                                                                                                                                                       | :CMe(CF <sub>3</sub> ) 76                                                               | :CMeCl 77                                                                                                                    |
| :C(OMe)(NMe <sub>2</sub> ) 78                                                          | :C(OPh)(NMe <sub>2</sub> ) 79                                                                                                                                                                              | :C(SMe)(NMe <sub>2</sub> ) 80                                                           | :C(SPh)(NMe <sub>2</sub> )<br>81                                                                                             |
|  82 |  83                                                                                                                     |  84 |  85                                     |
|  86 |  87                                                                                                                     |  88 |  89                                     |
|  90 |  91                                                                                                                     |  92 |  93                                     |
|  94 |  95                                                                                                                     |  96 |  97                                     |

|                                                                                         |                                                                                         |                                                                                           |                              |
|-----------------------------------------------------------------------------------------|-----------------------------------------------------------------------------------------|-------------------------------------------------------------------------------------------|------------------------------|
| <br>98 | <br>99 | <br>100 | CO 101                       |
| CS 102                                                                                  | C=CH <sub>2</sub> 103                                                                   | C=CMe <sub>2</sub> 104                                                                    | C=CPh <sub>2</sub> 105       |
| C=C=CH <sub>2</sub> 106                                                                 | C=C=CMe <sub>2</sub> 107                                                                | C=C=CPh <sub>2</sub> 108                                                                  | C=C=C=CH <sub>2</sub><br>109 |
| C=C=C=CMe <sub>2</sub> 110                                                              | C=C=C=CPh <sub>2</sub> 111                                                              | C≡N-H 112                                                                                 | C≡N-Me 113                   |
| C≡N-Ph 114                                                                              |                                                                                         |                                                                                           |                              |

**Table S2:** Descriptor loadings for principal component analysis on carbene ligands.

|                                | <b>PC1</b>  | <b>PC2</b>  | <b>PC3</b>  | <b>PC4</b> |
|--------------------------------|-------------|-------------|-------------|------------|
| <i>% of variance explained</i> | <i>41.4</i> | <i>16.9</i> | <i>12.2</i> | <i>7.4</i> |
| E <sub>HOMO(s)</sub>           | 0.201       | 0.065       | 0.361       | -0.191     |
| E <sub>LUMO(s)</sub>           | 0.281       | 0.016       | -0.040      | 0.022      |
| E <sub>t-s</sub>               | 0.236       | 0.035       | -0.298      | 0.072      |
| He <sub>8_steric</sub>         | 0.172       | -0.209      | -0.014      | 0.114      |
| PA                             | 0.228       | -0.020      | 0.309       | 0.035      |
| Q(Au fragm.)                   | -0.297      | -0.040      | -0.028      | 0.040      |
| BE(Au)                         | -0.055      | 0.279       | 0.369       | -0.168     |
| Au-Cl                          | 0.237       | -0.083      | 0.296       | 0.084      |
| Au-C                           | 0.265       | -0.176      | 0.006       | 0.034      |
| Δ C-A (Au)                     | -0.013      | -0.337      | 0.258       | 0.104      |
| Δ A-C-B (Au)                   | 0.039       | 0.365       | -0.022      | 0.411      |
| Q(Pd fragm.)                   | -0.268      | -0.084      | 0.010       | 0.158      |
| BE (Pd)                        | -0.171      | 0.242       | 0.257       | -0.158     |
| Pd-Cl <i>trans</i>             | 0.163       | 0.048       | 0.425       | -0.009     |
| Pd-C                           | 0.199       | -0.102      | -0.046      | 0.126      |
| Δ C-A (Pd)                     | -0.072      | -0.304      | 0.228       | 0.187      |
| Δ A-C-B (Pd)                   | 0.053       | 0.342       | 0.080       | 0.425      |
| Q(Ru fragm.)                   | -0.261      | -0.107      | 0.054       | 0.110      |
| BE (Ru)                        | -0.246      | 0.178       | 0.185       | -0.160     |
| Ru-C                           | 0.259       | -0.076      | -0.041      | 0.007      |
| Ru-Cl                          | 0.280       | 0.079       | -0.091      | -0.102     |
| Ru-P                           | -0.248      | -0.200      | 0.052       | 0.170      |
| Δ C-A (Ru)                     | 0.009       | -0.220      | 0.152       | 0.272      |
| Δ A-C-B (Ru)                   | 0.016       | 0.325       | 0.023       | 0.479      |
| < Cl-Ru-Cl                     | 0.114       | 0.177       | -0.085      | -0.219     |
| < P-Ru-P                       | -0.019      | 0.134       | -0.067      | -0.128     |

**Table S3:** Descriptor loadings for principal component analysis on all C-donor ligands.

|                         | PC1    | PC2    | PC3    | PC4    |
|-------------------------|--------|--------|--------|--------|
| % of variance explained | 47.7   | 16.0   | 13.6   | 5.9    |
| $E_{\text{HOMO(s)}}$    | 0.218  | -0.228 | 0.265  | 0.040  |
| $E_{\text{LUMO(s)}}$    | 0.272  | 0.112  | -0.030 | -0.053 |
| $E_{\text{t-s}}$        | 0.163  | 0.372  | -0.167 | -0.036 |
| He <sub>8</sub> _steric | 0.182  | -0.063 | -0.209 | 0.525  |
| PA                      | 0.225  | -0.224 | 0.157  | 0.090  |
| Q(Au fragm.)            | -0.294 | -0.038 | -0.061 | 0.054  |
| BE(Au)                  | -0.032 | -0.189 | 0.491  | 0.135  |
| Au-Cl                   | 0.254  | -0.240 | -0.058 | 0.051  |
| Au-C                    | 0.273  | -0.120 | -0.092 | 0.020  |
| $\Delta$ C-A (Au)       | 0.042  | -0.372 | -0.237 | -0.193 |
| Q(Pd fragm.)            | -0.268 | -0.038 | -0.099 | -0.013 |
| BE (Pd)                 | -0.156 | -0.142 | 0.397  | 0.011  |
| Pd-Cl <i>trans</i>      | 0.206  | -0.277 | 0.193  | -0.035 |
| Pd-C                    | 0.231  | -0.097 | -0.080 | -0.040 |
| $\Delta$ C-A (Pd)       | -0.018 | -0.367 | -0.251 | -0.239 |
| Q(Ru fragm.)            | -0.260 | -0.132 | -0.097 | 0.091  |
| BE (Ru)                 | -0.239 | -0.110 | 0.293  | -0.134 |
| Ru-C                    | 0.269  | -0.035 | -0.034 | 0.177  |
| Ru-Cl                   | 0.271  | 0.168  | 0.058  | -0.079 |
| Ru-P                    | -0.228 | -0.218 | -0.218 | 0.062  |
| $\Delta$ C-A (Ru)       | 0.047  | -0.244 | -0.238 | -0.255 |
| < Cl-Ru-Cl              | 0.112  | 0.196  | 0.170  | -0.638 |
| < P-Ru-P                | -0.101 | 0.200  | 0.110  | 0.210  |

**Table S4:** Descriptor coefficients for regression models 1-3, for prediction of calculated bond energy for dissociation of *trans*-CO in [Cr(CO)<sub>5</sub>L] (kcal/mol)**Descriptors**      **Coefficients***Model 1*

|                         |          |
|-------------------------|----------|
| Intercept               | -22.4479 |
| E <sub>t-s</sub>        | 0.0578   |
| Q(Au fragm.)            | -15.9614 |
| Ru-C                    | 34.2148  |
| He <sub>8</sub> _steric | -0.0473  |

*Model 2*

|                         |          |
|-------------------------|----------|
| Intercept               | -26.3109 |
| E <sub>t-s</sub>        | 0.0581   |
| PA                      | 0.0269   |
| Q(Au fragm.)            | -9.2826  |
| BE (Pd)                 | -0.0688  |
| Ru-C                    | 35.2689  |
| He <sub>8</sub> _steric | -0.0662  |

*Model 3*

|                         |           |
|-------------------------|-----------|
| Intercept               | 305.2383  |
| E <sub>HOMO</sub>       | -46.7534  |
| E <sub>t-s</sub>        | 0.0257    |
| P <sub>A</sub>          | 0.0620    |
| BE (Au)                 | 0.1323    |
| Au-Cl                   | -55.9431  |
| Au-C                    | 63.1273   |
| BE (Ru)                 | -0.1231   |
| Ru-P                    | -119.1609 |
| He <sub>8</sub> _steric | -0.0780   |

**Table S5:** Calculated response data and model predictions for calculated bond energy for dissociation of *trans*-CO in [Cr(CO)<sub>5</sub>L] (kcal/mol)

| No. | Calc. BE (trans CO) | Model 1, predicted | Model 1, residual | Model 2, predicted | Model 2, residual | Model 3, predicted | Model 3, residual |
|-----|---------------------|--------------------|-------------------|--------------------|-------------------|--------------------|-------------------|
| 1   | 39.13               | 39.62              | -0.49             | 37.72              | 1.41              | 38.89              | 0.24              |
| 2   | 41.80               | 42.86              | -1.06             | 42.33              | -0.53             | 42.08              | -0.28             |
| 3   | 43.01               | 43.97              | -0.96             | 44.38              | -1.37             | 43.74              | -0.73             |
| 4   | 50.99               | 53.38              | -2.39             | 52.83              | -1.84             | 51.98              | -0.99             |
| 5   | 52.34               | 52.25              | 0.09              | 52.27              | 0.07              | 52.09              | 0.25              |
| 6   | 50.38               | 50.00              | 0.38              | 50.49              | -0.11             | 50.53              | -0.15             |
| 7   | 51.91               | 52.92              | -1.01             | 52.25              | -0.34             | 52.36              | -0.45             |
| 8   | 52.81               | 53.69              | -0.88             | 53.68              | -0.87             | 52.61              | 0.20              |
| 9   | 51.54               | 51.58              | -0.04             | 51.94              | -0.40             | 51.64              | -0.10             |
| 10  | 48.08               | 47.37              | 0.71              | 47.42              | 0.66              | 47.76              | 0.32              |
| 11  | 49.30               | 48.15              | 1.15              | 48.26              | 1.04              | 48.67              | 0.63              |
| 12  | 49.61               | 47.80              | 1.81              | 48.13              | 1.48              | 49.09              | 0.52              |
| 13  | 45.20               | 43.79              | 1.41              | 44.40              | 0.80              | 45.02              | 0.18              |
| 14  | 47.33               | 45.48              | 1.85              | 46.13              | 1.20              | 45.95              | 1.38              |
| 15  | 46.45               | 45.21              | 1.24              | 46.20              | 0.25              | 45.67              | 0.78              |
| 16  | 44.84               | 43.87              | 0.97              | 44.49              | 0.35              | 45.05              | -0.21             |
| 17  | 48.46               | 45.78              | 2.68              | 46.45              | 2.01              | 46.48              | 1.98              |
| 18  | 47.67               | 45.75              | 1.92              | 46.69              | 0.98              | 46.39              | 1.28              |
| 19  | 44.39               | 45.09              | -0.70             | 45.13              | -0.74             | 44.45              | -0.06             |
| 20  | 45.50               | 46.77              | -1.27             | 45.90              | -0.40             | 46.24              | -0.74             |
| 21  | 44.29               | 44.97              | -0.68             | 44.77              | -0.48             | 44.42              | -0.13             |
| 22  | 44.57               | 47.08              | -2.51             | 46.12              | -1.55             | 46.14              | -1.57             |
| 23  | 45.26               | 46.47              | -1.21             | 46.06              | -0.80             | 46.38              | -1.12             |
| 24  | 43.74               | 44.27              | -0.53             | 44.64              | -0.90             | 45.21              | -1.47             |
| 25  | 41.13               | 41.29              | -0.16             | 40.21              | 0.92              | 39.74              | 1.39              |
| 26  | 42.56               | 42.87              | -0.31             | 42.79              | -0.23             | 42.81              | -0.25             |
| 27  | 41.42               | 43.18              | -1.76             | 43.14              | -1.72             | 43.40              | -1.98             |
| 28  | 48.65               | 49.21              | -0.56             | 48.78              | -0.13             | 48.72              | -0.07             |
| 29  | 49.87               | 49.58              | 0.29              | 49.44              | 0.43              | 48.79              | 1.08              |
| 30  | 48.52               | 48.58              | -0.06             | 48.87              | -0.35             | 49.10              | -0.58             |
| 31  | 49.12               | 50.00              | -0.88             | 49.76              | -0.64             | 48.88              | 0.24              |
| 32  | 49.57               | 49.57              | 0.00              | 49.28              | 0.29              | 48.50              | 1.07              |
| 33  | 48.78               | 48.42              | 0.36              | 48.52              | 0.26              | 48.12              | 0.66              |
| 34  | 48.46               | 48.45              | 0.01              | 47.94              | 0.52              | 48.81              | -0.35             |
| 35  | 49.14               | 49.27              | -0.13             | 49.16              | -0.02             | 48.98              | 0.16              |
| 36  | 48.48               | 48.17              | 0.31              | 48.42              | 0.06              | 49.13              | -0.65             |
| 37  | 41.44               | 41.90              | -0.46             | 41.22              | 0.22              | 41.46              | -0.02             |
| 38  | 42.77               | 43.34              | -0.57             | 42.99              | -0.22             | 42.98              | -0.21             |
| 39  | 42.41               | 44.06              | -1.65             | 44.39              | -1.98             | 44.27              | -1.86             |
| 40  | 42.43               | 42.69              | -0.26             | 42.21              | 0.22              | 42.53              | -0.10             |
| 41  | 43.11               | 43.20              | -0.09             | 43.01              | 0.10              | 43.45              | -0.34             |
| 42  | 40.21               | 44.29              | -4.08             | 45.58              | -5.37             | 44.25              | -4.04             |
| 43  | 45.09               | 43.22              | 1.87              | 43.62              | 1.47              | 41.87              | 3.22              |



| No. | Calc. BE (trans CO) | Model 1, predicted | Model 1, residual | Model 2, predicted | Model 2, residual | Model 3, predicted | Model 3, residual |
|-----|---------------------|--------------------|-------------------|--------------------|-------------------|--------------------|-------------------|
| 45  | 49.45               | 47.97              | 1.48              | 48.03              | 1.42              | 48.07              | 1.38              |
| 46  | 46.19               | 47.43              | -1.24             | 47.15              | -0.96             | 47.12              | -0.93             |
| 47  | 45.42               | 47.46              | -2.04             | 48.01              | -2.59             | 46.89              | -1.47             |
| 48  | 52.60               | 52.42              | 0.18              | 52.16              | 0.44              | 52.05              | 0.55              |
| 49  | 50.52               | 49.04              | 1.48              | 48.68              | 1.84              | 48.96              | 1.56              |
| 50  | 49.35               | 50.92              | -1.57             | 50.57              | -1.22             | 50.26              | -0.91             |
| 51  | 51.72               | 50.06              | 1.66              | 50.49              | 1.23              | 51.17              | 0.55              |
| 52  | 51.46               | 49.35              | 2.11              | 49.87              | 1.59              | 51.00              | 0.46              |
| 53  | 53.74               | 53.68              | 0.06              | 53.55              | 0.19              | 53.10              | 0.64              |
| 54  | 51.54               | 51.92              | -0.38             | 51.70              | -0.16             | 52.16              | -0.62             |
| 55  | 51.20               | 53.10              | -1.90             | 52.85              | -1.65             | 52.52              | -1.32             |
| 56  | 52.43               | 50.65              | 1.78              | 51.07              | 1.36              | 52.44              | -0.01             |
| 57  | 52.23               | 52.18              | 0.05              | 52.78              | -0.55             | 53.68              | -1.45             |
| 58  | 46.06               | 46.27              | -0.21             | 45.57              | 0.49              | 45.78              | 0.28              |
| 59  | 45.70               | 46.41              | -0.71             | 45.80              | -0.10             | 45.97              | -0.27             |
| 60  | 40.28               | 43.13              | -2.85             | 43.21              | -2.93             | 43.24              | -2.96             |
| 61  | 47.92               | 48.73              | -0.81             | 48.13              | -0.21             | 48.57              | -0.65             |
| 62  | 49.44               | 49.06              | 0.38              | 49.00              | 0.44              | 48.56              | 0.88              |
| 63  | 48.01               | 48.00              | 0.01              | 48.28              | -0.27             | 48.30              | -0.29             |
| 64  | 43.25               | 44.88              | -1.63             | 43.88              | -0.63             | 44.16              | -0.91             |
| 65  | 47.12               | 46.84              | 0.28              | 46.92              | 0.20              | 47.16              | -0.04             |
| 66  | 43.61               | 43.11              | 0.50              | 43.91              | -0.30             | 43.07              | 0.54              |
| 67  | 44.53               | 44.02              | 0.51              | 44.96              | -0.43             | 44.36              | 0.17              |
| 68  | 38.41               | 38.64              | -0.23             | 38.51              | -0.10             | 38.33              | 0.08              |
| 69  | 40.69               | 40.27              | 0.42              | 39.95              | 0.74              | 39.54              | 1.15              |
| 70  | 42.04               | 42.01              | 0.03              | 42.44              | -0.40             | 42.06              | -0.02             |
| 71  | 43.36               | 44.44              | -1.08             | 43.60              | -0.24             | 43.47              | -0.11             |
| 72  | 40.49               | 40.82              | -0.33             | 41.14              | -0.65             | 41.70              | -1.21             |
| 73  | 40.38               | 39.58              | 0.80              | 40.33              | 0.05              | 40.19              | 0.19              |
| 74  | 38.08               | 39.39              | -1.31             | 40.34              | -2.26             | 39.73              | -1.65             |
| 75  | 38.20               | 38.32              | -0.12             | 38.69              | -0.49             | 38.03              | 0.17              |
| 76  | 39.98               | 40.51              | -0.53             | 39.25              | 0.73              | 40.24              | -0.26             |
| 77  | 41.83               | 41.37              | 0.46              | 41.16              | 0.67              | 41.25              | 0.58              |
| 78  | 50.99               | 50.46              | 0.53              | 49.99              | 1.00              | 50.44              | 0.55              |
| 79  | 49.95               | 48.69              | 1.26              | 48.62              | 1.33              | 49.84              | 0.11              |
| 80  | 50.80               | 47.84              | 2.96              | 47.67              | 3.13              | 48.37              | 2.43              |
| 81  | 49.52               | 47.35              | 2.17              | 47.62              | 1.90              | 48.47              | 1.05              |
| 82  | 42.32               | 43.33              | -1.01             | 42.89              | -0.57             | 41.73              | 0.59              |
| 83  | 41.22               | 41.84              | -0.62             | 41.02              | 0.20              | 40.79              | 0.43              |
| 84  | 42.39               | 43.23              | -0.84             | 42.80              | -0.41             | 42.60              | -0.21             |
| 85  | 41.52               | 43.18              | -1.66             | 42.21              | -0.69             | 41.92              | -0.40             |
| 86  | 51.65               | 50.93              | 0.72              | 50.75              | 0.90              | 51.68              | -0.03             |
| 87  | 48.26               | 49.29              | -1.03             | 49.10              | -0.84             | 49.56              | -1.30             |
| 88  | 52.38               | 53.41              | -1.03             | 53.27              | -0.89             | 52.29              | 0.09              |
| 89  | 52.50               | 52.25              | 0.25              | 52.25              | 0.25              | 52.38              | 0.12              |

| <b>No.</b> | <b>Calc. BE (trans CO)</b> | <b>Model 1,<br/>predicted</b> | <b>Model 1,<br/>residual</b> | <b>Model 2,<br/>predicted</b> | <b>Model 2,<br/>residual</b> | <b>Model 3,<br/>predicted</b> | <b>Model 3,<br/>residual</b> |
|------------|----------------------------|-------------------------------|------------------------------|-------------------------------|------------------------------|-------------------------------|------------------------------|
| 90         | 52.76                      | 51.09                         | 1.67                         | 52.17                         | 0.59                         | 50.92                         | 1.84                         |
| 91         | 52.70                      | 52.43                         | 0.27                         | 52.36                         | 0.34                         | 52.50                         | 0.20                         |
| 92         | 51.62                      | 52.94                         | -1.32                        | 52.61                         | -0.99                        | 52.04                         | -0.42                        |
| 93         | 52.46                      | 52.71                         | -0.25                        | 52.67                         | -0.21                        | 52.20                         | 0.26                         |
| 94         | 51.68                      | 50.33                         | 1.35                         | 50.55                         | 1.13                         | 50.53                         | 1.15                         |
| 95         | 50.27                      | 49.21                         | 1.06                         | 49.64                         | 0.63                         | 49.78                         | 0.49                         |
| 96         | 50.94                      | 51.04                         | -0.10                        | 51.31                         | -0.37                        | 51.39                         | -0.45                        |
| 97         | 50.62                      | 50.50                         | 0.12                         | 50.98                         | -0.36                        | 51.04                         | -0.42                        |
| 98         | 45.37                      | 46.05                         | -0.68                        | 46.06                         | -0.69                        | 45.32                         | 0.05                         |
| 99         | 48.18                      | 45.47                         | 2.71                         | 46.05                         | 2.13                         | 46.24                         | 1.94                         |
| 100        | 47.28                      | 45.43                         | 1.85                         | 46.26                         | 1.02                         | 46.21                         | 1.07                         |
| 101        | 44.58                      | 47.60                         | -3.02                        | 46.57                         | -1.99                        | 45.83                         | -1.25                        |
| 102        | 40.61                      | 42.19                         | -1.58                        | 41.84                         | -1.23                        | 41.26                         | -0.65                        |
| 103        | 41.26                      | 41.25                         | 0.01                         | 40.63                         | 0.63                         | 39.99                         | 1.27                         |
| 104        | 42.61                      | 41.92                         | 0.69                         | 42.22                         | 0.39                         | 42.45                         | 0.16                         |
| 105        | 41.57                      | 40.93                         | 0.64                         | 41.49                         | 0.08                         | 41.28                         | 0.29                         |
| 106        | 42.79                      | 41.20                         | 1.59                         | 41.20                         | 1.59                         | 42.39                         | 0.40                         |
| 107        | 44.57                      | 42.95                         | 1.62                         | 43.34                         | 1.23                         | 44.11                         | 0.46                         |
| 108        | 44.97                      | 43.77                         | 1.20                         | 44.56                         | 0.41                         | 45.52                         | -0.55                        |
| 109        | 42.16                      | 41.22                         | 0.94                         | 41.32                         | 0.84                         | 41.41                         | 0.75                         |
| 110        | 41.57                      | 41.55                         | 0.02                         | 41.96                         | -0.39                        | 42.01                         | -0.44                        |
| 111        | 42.37                      | 40.92                         | 1.45                         | 41.40                         | 0.97                         | 41.45                         | 0.92                         |
| 112        | 47.22                      | 47.53                         | -0.31                        | 47.47                         | -0.25                        | 47.92                         | -0.70                        |
| 113        | 48.42                      | 48.63                         | -0.21                        | 48.85                         | -0.43                        | 49.48                         | -1.06                        |
| 114        | 47.62                      | 46.64                         | 0.98                         | 46.98                         | 0.64                         | 47.60                         | 0.02                         |

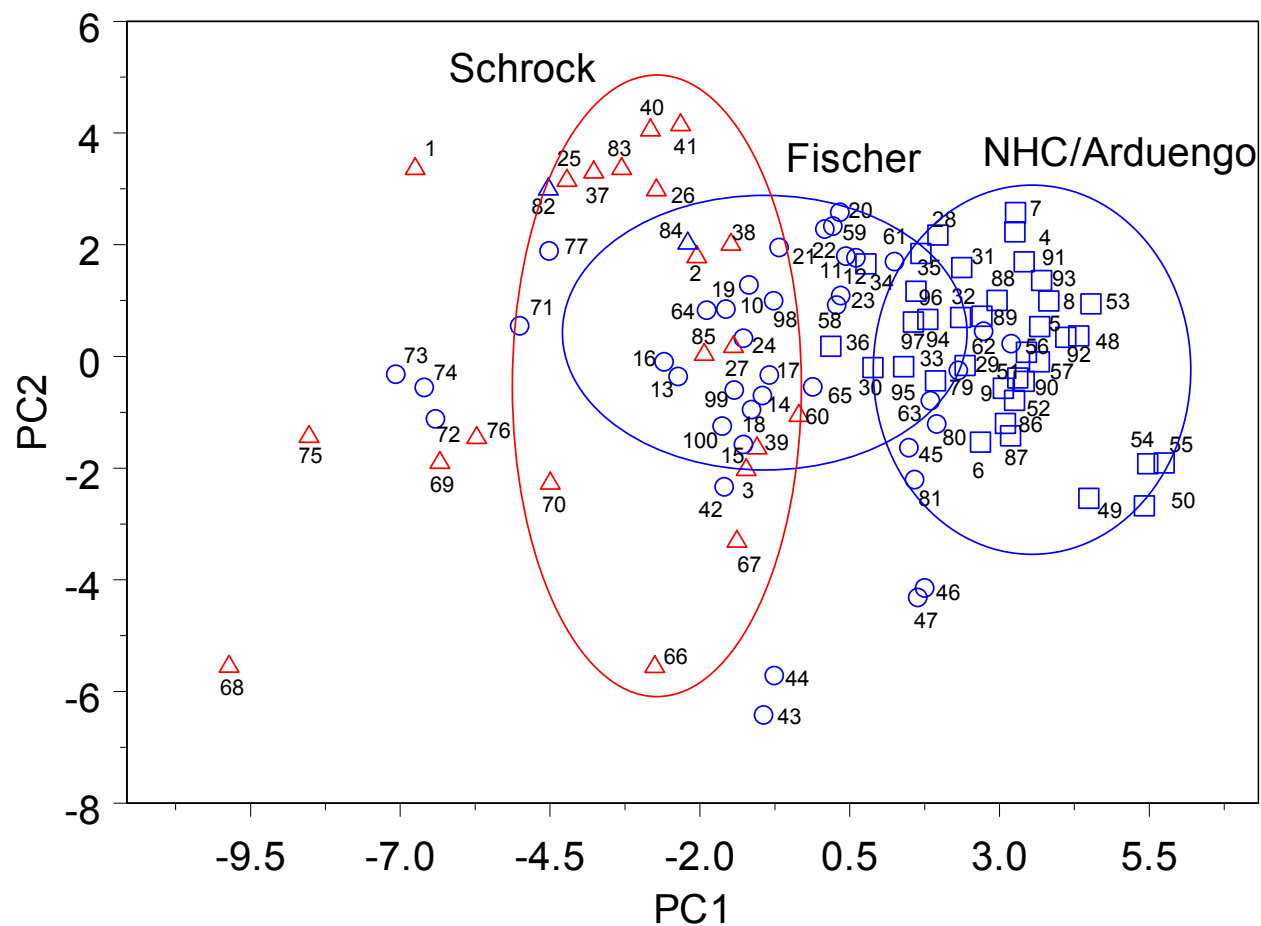

**Fig. S1:** Principal component score plot (PC1 and PC2) for carbene ligands in LKB-C. Colours distinguish ground state electron configuration of free ligand (red = triplet, blue = singlet), shapes relate to substitution pattern, where triangle,  $\Delta$  = Schrock-type, circle,  $\circ$  = Fischer type, square,  $\square$  = NHC/Arduengo.

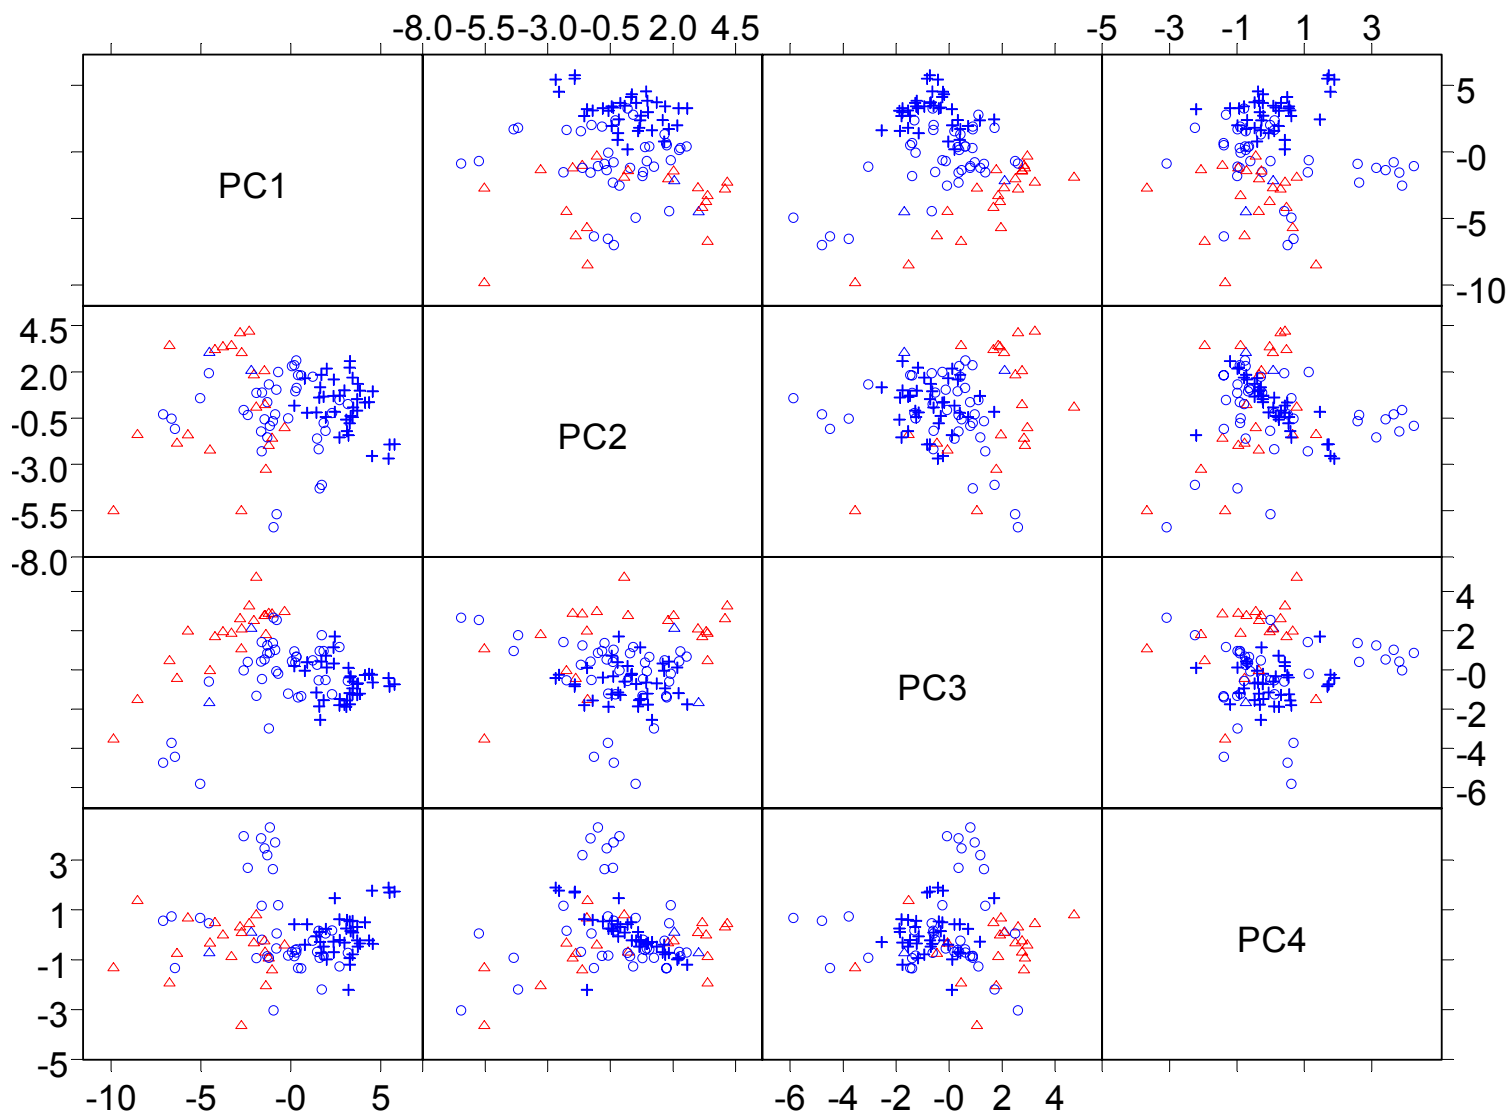

**Fig. S2:** Matrix plot of PCs 1-4 for principal component analysis of carbene ligands.

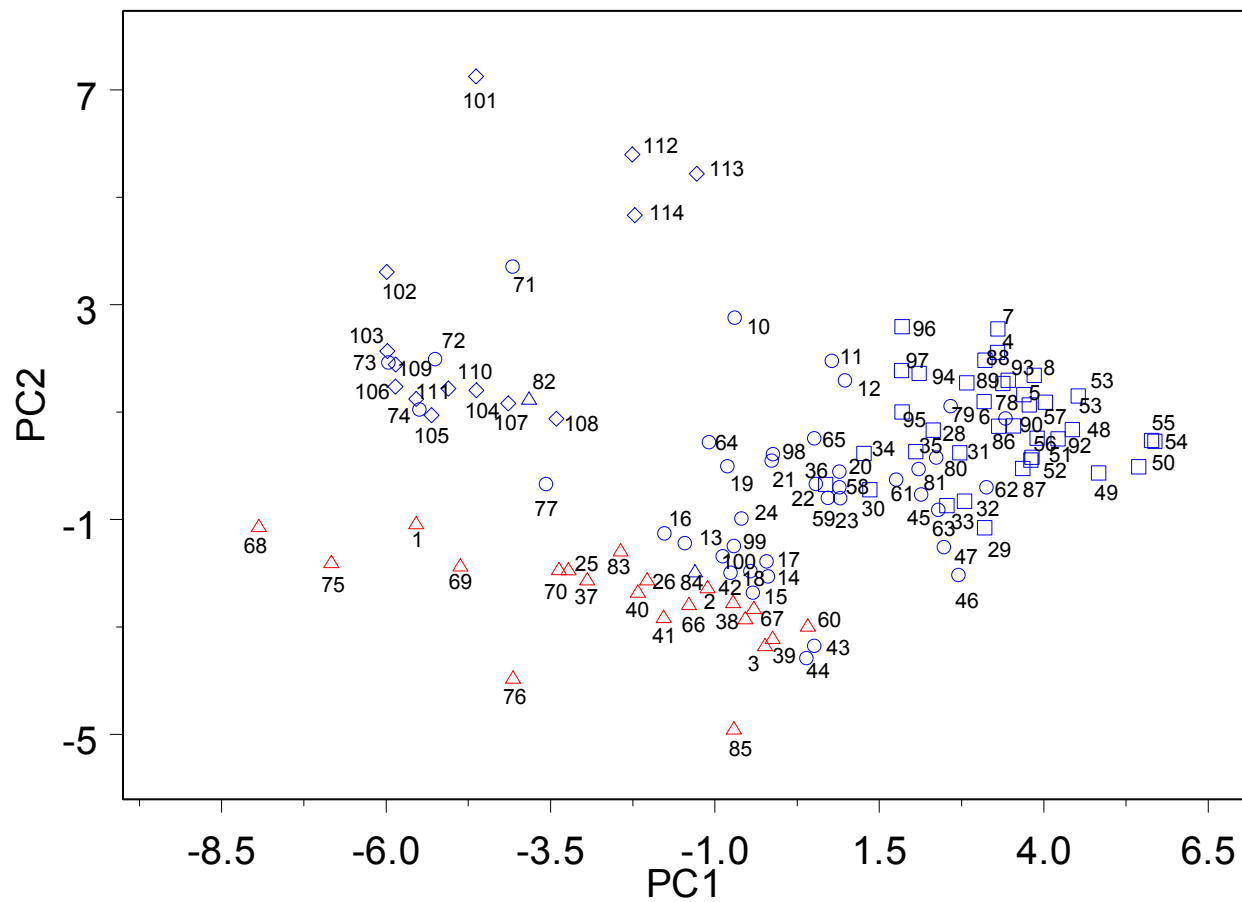

**Fig. S3:** Principal component score plot (PC1 and PC2) for all ligands in LKB-C. Colours distinguish ground state electron configuration of free ligand (red = triplet, blue = singlet), shapes relate to substitution pattern, where triangle,  $\Delta$  = Schrock-type, circle,  $\circ$  = Fischer type, square,  $\square$  = NHC/Arduengo, diamond,  $\diamond$  = other ligands.

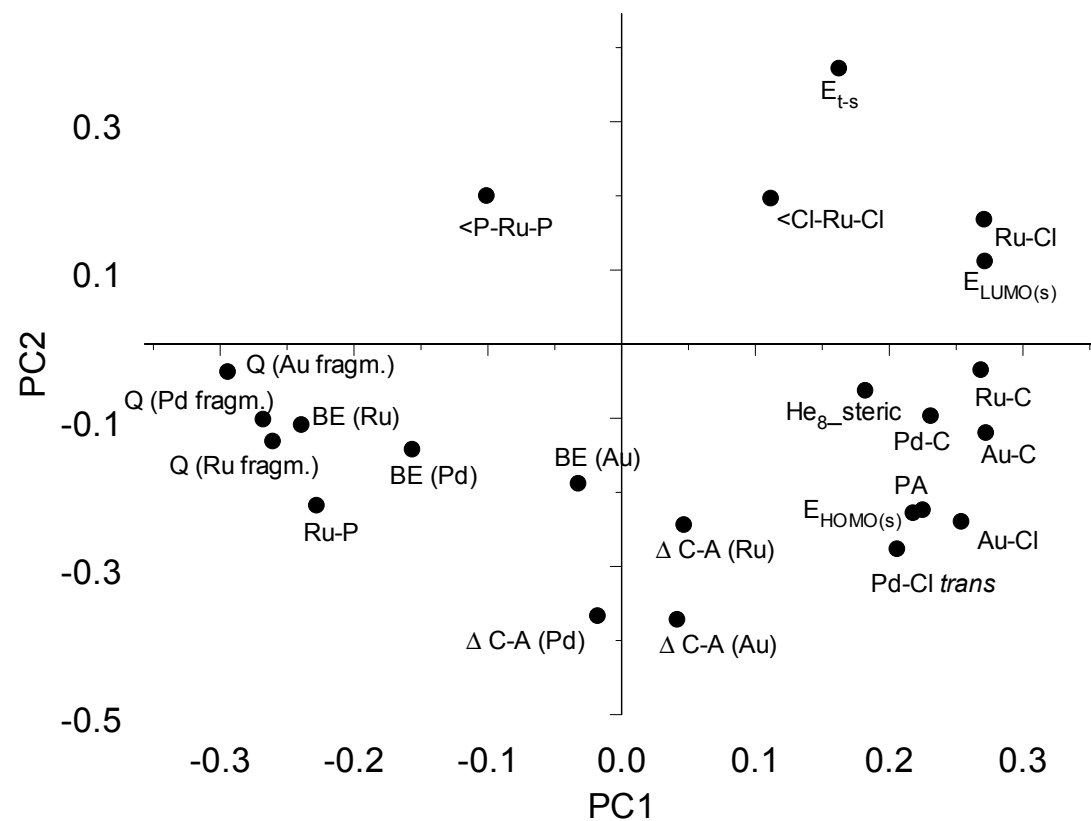

**Fig. S4:** Principal component loadings (PC1 and PC2) for analysis on all ligands.

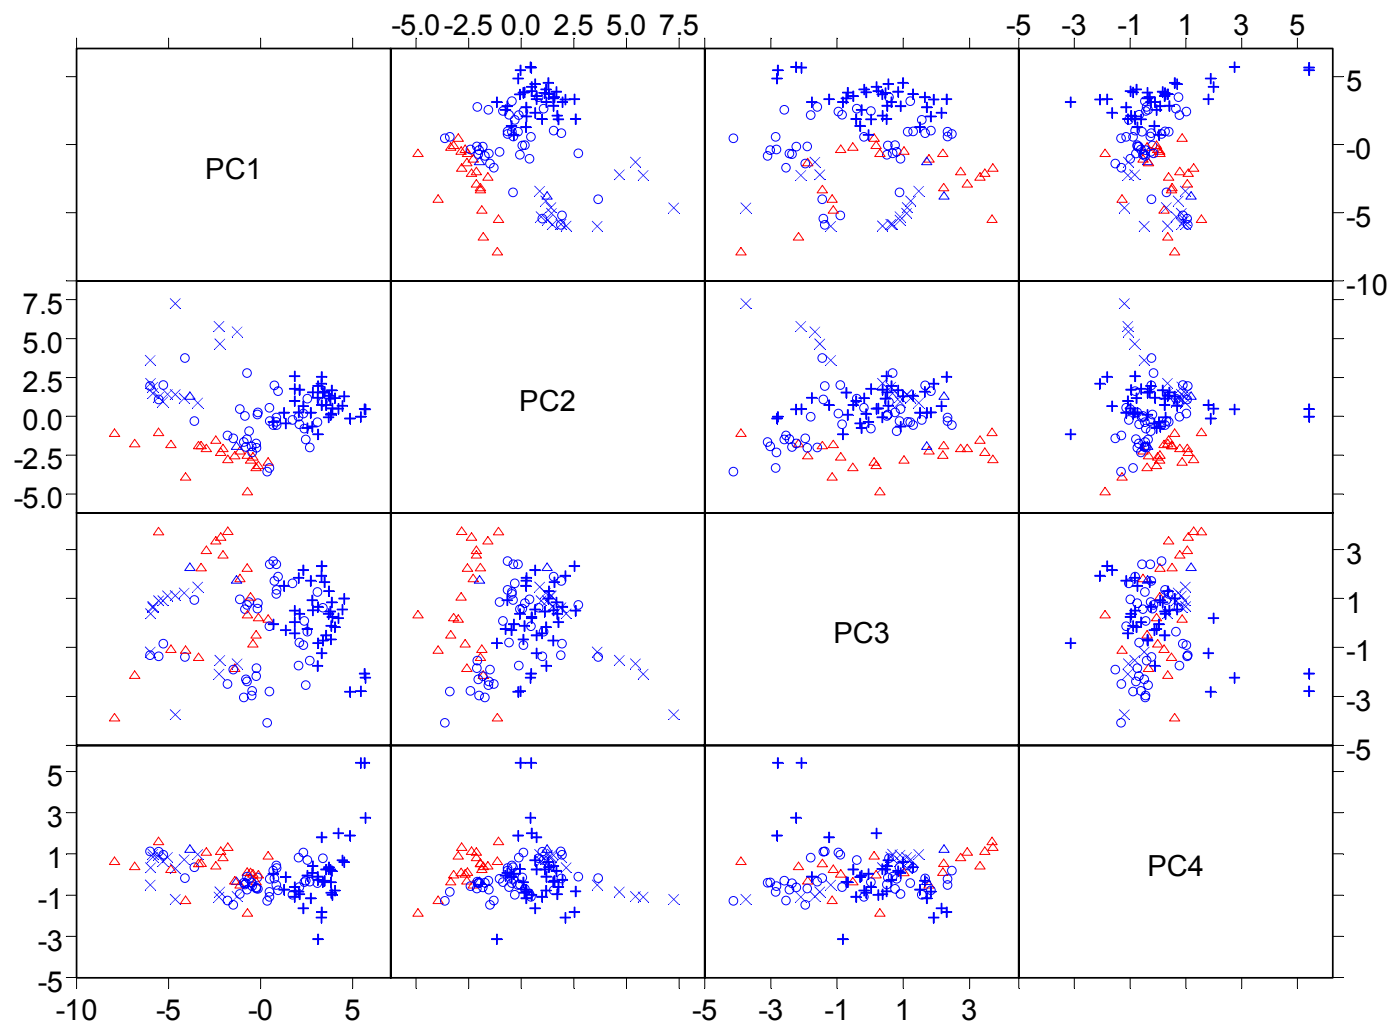

**Fig. S4:** Matrix plot of PCs 1-4 for principal component analysis of all ligands in LKB-C.
